# Supplementary material
Source: PubMed Central journal article supplement (PMC5728313)
Supplement: ba004457-suppl1.pdf [file ba004457-suppl1.pdf]

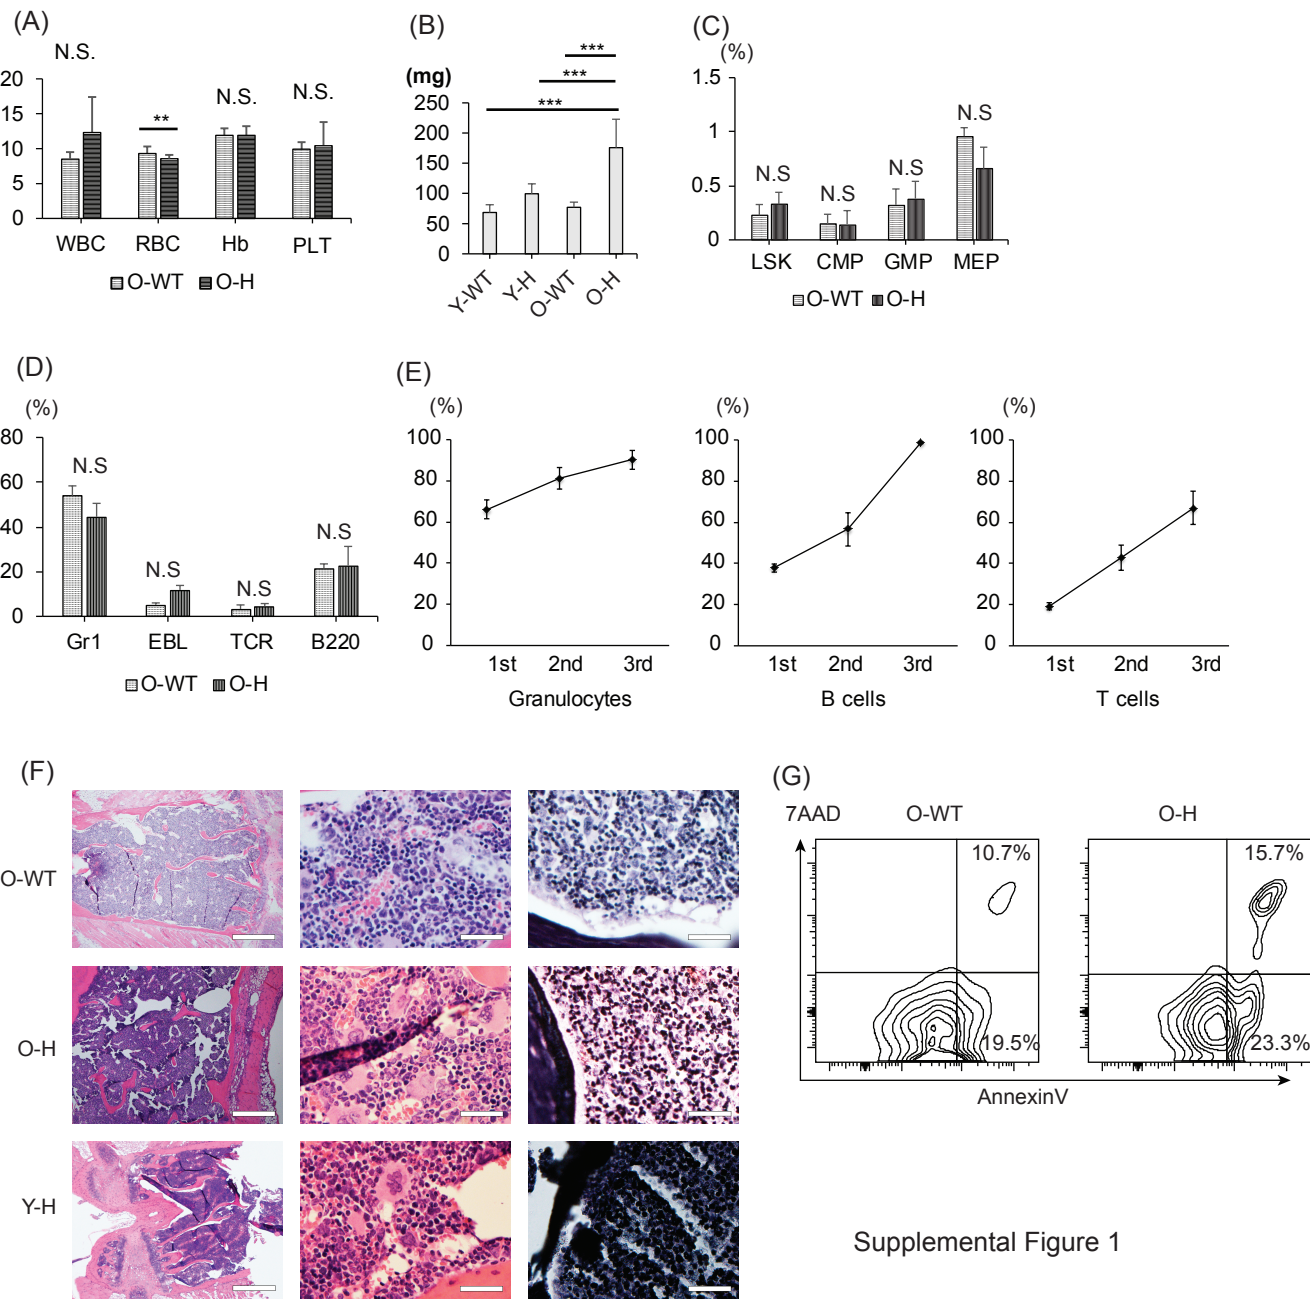

**Supplemental Figure 1.  $\Delta Hmga2$  mice develop a mild MDS/MPN-like disease after a long term.**

(A) Complete blood cell count of aged (60-week-old) mice. N = 8 for O-WT and 16 for O-H. \*\*, P < 0.01 by a Student's *t*-test. WBC, white blood cells ( $\times 10^9/L$ ); RBC ( $\times 10^{12}/L$ ); Hb, hemoglobin (g/dL); and PLT, platelets ( $\times 10^{11}/L$ ).

(B) Spleen weight. N = 11 for Y-WT, 9 Y-H, 12 O-WT, and 11 O-H. \*\*\*, P < 0.001 (Tukey-HSD test).

(C) The ratio of stem and progenitor cells and (D) differentiated cells in BM-MNCs (N = 3 - 5).

The difference was evaluated by a Student's *t*-test.

(E) Competitive serial BMT from O-H mice (Ly5.2<sup>+</sup>) to lethally irradiated Ly5.1<sup>+</sup> mice. The BMT was repeated every 20 weeks. The chimerism of Ly5.2<sup>+</sup> cells is shown (N = 3 for each).

(F) BM histology of O-WT, O-H, and Y-H mice. Hematoxylin-eosin (upper; x 40 and middle; x 400) and silver (lower) stains are shown. The scale bars indicate 500  $\mu\text{m}$  for the upper and 50  $\mu\text{m}$  for the middle and lower panels.

(G) Apoptotic CD71<sup>+</sup>Ter119<sup>+</sup> erythroblasts (Annexin V/7AAD staining). Similar results were obtained by three independent experiments.

(A-E) Bars show the means  $\pm$  SEM.

(A-G) Y-WT, young WT (8-week-old); O-WT, old WT (60-week-old); Y-H, young  $\Delta Hmga2$ ; O-H, old  $\Delta Hmga2$ .

**Supplemental Table 1. The primers used for quantitative RT-PCR.**

| Gene             | Species | Description | Forward primers           | Reverse primers                    |
|------------------|---------|-------------|---------------------------|------------------------------------|
| <i>Actin</i>     | mouse   | SYBR green  | CATCCGTAAAGACCTCTATGCCAAC | ATGGAGCCACCGATCCACA                |
| <i>Stat3</i>     | mouse   | SYBR green  | AATGGAAATTGCCCGGATC       | AGGCGAGACTCTTCCCACAG               |
| <i>HPRT1</i>     | human   | TaqMan      |                           | Hs99999909_m1 (LifeTechnologies)   |
| <i>HMAG2</i>     | human   | TaqMan      |                           | Hs00171569_m1 (LifeTechnologies)   |
| <i>U6</i>        | human   | TaqMan      |                           | Assay ID 001973 (LifeTechnologies) |
| <i>MIRlet-7a</i> | human   | TaqMan      |                           | Assay ID 000377 (LifeTechnologies) |
| <i>MIRlet-7b</i> | human   | TaqMan      |                           | Assay ID 002619 (LifeTechnologies) |
| <i>MIRlet-7c</i> | human   | TaqMan      |                           | Assay ID 000379 (LifeTechnologies) |

**Supplemental Table 2. Upregulated genes in RNAseq.**

| JE and HJ compared to WT | JE and HJ compared to J |
|--------------------------|-------------------------|
| 0610040B10Rik            | 1700048O20Rik           |
| 0610040J01Rik            | 1700084E18Rik           |
| 1700001G17Rik            | 1810041H14Rik           |
| 1700001O22Rik            | 2310010G23Rik           |
| 1700012D01Rik            | 2310033P09Rik           |
| 1700120K04Rik            | 2310075C17Rik           |
| 2010111I01Rik            | 2610305D13Rik           |
| 2310010J17Rik            | 2900076A07Rik           |
| 2810429I04Rik            | 4930512M02Rik           |
| 3110070M22Rik            | 4930533N22Rik           |
| 4930557K07Rik            | 5730408K05Rik           |
| 4933404O12Rik            | 5830444B04Rik           |
| 5730408K05Rik            | 9030617O03Rik           |
| 5730559C18Rik            | A330069E16Rik           |
| 6030498E09Rik            | AA465934                |
| 8430426J06Rik            | Ahi1                    |
| 9030617O03Rik            | Aldh111                 |
| A930041C12Rik            | Aldoc                   |
| AA465934                 | Ankrd13d                |
| Abca4                    | Ankrd37                 |
| Abhd17b                  | Arhgef4                 |
| Ackr1                    | Arl5c                   |
| Acp5                     | Asns                    |
| Actr3b                   | Aspa                    |
| Adam9                    | BC022687                |
| Adamts17                 | Bach2os                 |
| Agpat5                   | Blnk                    |
| Akr1c12                  | Ccdc126                 |
| Akr1c19                  | Ccl8                    |
| Alox5                    | Ccr7                    |
| Amigo3                   | Cd302                   |
| Ankrd28                  | Cd6                     |
| Ap3s1                    | Cdk5rap1                |
| Apc2                     | Cenpv                   |
| Apol10b                  | Chad                    |
| Arhgdig                  | Chpf                    |

|          |                    |
|----------|--------------------|
| Arid5a   | Cib2               |
| Arx      | Cnn3               |
| Asns     | Cox6a2             |
| Ass1     | Cstad              |
| Atp1a3   | Cx3cr1             |
| Atp8b4   | Cyp2r1             |
| B4galnt4 | Cyp51              |
| BC021614 | Degs2              |
| Bcas1    | Dhx58              |
| Bcat1    | Dpcd               |
| Bcl3     | Drc7               |
| Bdh1     | Dusp9              |
| Bhlhe40  | E130304I02Rik      |
| C2cd4b   | Efemp2             |
| C4b      | Emc8-1190005i06rik |
| Camk2a   | Epb4.1I4aos        |
| Camk2b   | Evl                |
| Car12    | Fam71e1            |
| Card9    | Fdps               |
| Cbr3     | Fxyd1              |
| Ccdc109b | Gapt               |
| Ccdc64   | Gcat               |
| Ccl6     | Gm13139            |
| Ccne1    | Gm13152            |
| Ccng1    | Gm15350            |
| Ccnj     | Gm15471            |
| Ccr1     | Gm20319            |
| Ccr2     | Gm38431            |
| Ccr5     | Gm38670            |
| Ccrn4l   | Gm5424             |
| Cd14     | Gm5547             |
| Cd200r3  | Gm7008             |
| Cd38     | Gnat2              |
| Cdkn1a   | Gpc1               |
| Cers6    | Gpr25              |
| Chad     | Gpx7               |
| Chd7     | H2-Q8              |
| Chst13   | H2-T24             |
| Clca3a1  | Hebp1              |

|               |              |
|---------------|--------------|
| Clec10a       | Hist1h2ai    |
| Clnk          | Hist1h2bl    |
| Clu           | Hist1h3g     |
| Col18a1       | Hist1h4c     |
| Cox4i2        | Hist2h2ab    |
| Csf1r         | Hist3h2ba    |
| Csf2rb        | Hopx         |
| Csf2rb2       | Hoxaas3      |
| Csprs         | Hsd17b1      |
| Cst7          | Hspa2        |
| Ctsg          | Idi1         |
| Ctsz          | Ifi27        |
| Cx3cr1        | Ifi27l2a     |
| Cxcl2         | Ifi44        |
| Cxcr2         | Ifit1        |
| Cyb561        | Ifit43       |
| Cyp4f18       | Il17re       |
| Degs2         | Il27         |
| Dgat2         | Insig1       |
| Dhx40         | Irf7         |
| Dlk1          | Isg15        |
| Dmkn          | Kcng1        |
| Dock9         | Kifc3        |
| Dtx4          | LOC100041034 |
| Dusp9         | LOC664787    |
| E130012A19Rik | Ldlr         |
| E130304I02Rik | Lenep        |
| Echdc2        | Lhcgr        |
| Ecm1          | Lmo1         |
| Efemp2        | Lrp11        |
| Egln3         | Mgst2        |
| Egr4          | Mmp11        |
| Ehd3          | Mpst         |
| Emilin2       | Mt1          |
| Endog         | Ndn          |
| Epb4.1l4aos   | Noxo1        |
| Esm1          | Npff         |
| Evpl          | Nrg4         |
| F13a1         | Nucb2        |

|         |          |
|---------|----------|
| Fabp5   | Oas1a    |
| Fads2   | Oas1g    |
| Fads3   | Oas2     |
| Fam118b | Oas3     |
| Fam84b  | Oscp1    |
| Fcer1a  | Pcbd1    |
| Ffar2   | Pfn4     |
| Fgf3    | Prss16   |
| Fgr     | Psme2b   |
| Fhl3    | Ptprf    |
| Fkbp11  | Pydc3    |
| Flnb    | Pygm     |
| Fndc3b  | Rnd1     |
| Frmd6   | Rtp4     |
| Fstl3   | Rundc3a  |
| Fut8    | Samd8    |
| Gadd45b | Sap25    |
| Gadd45g | Sdc3     |
| Galr3   | 41161    |
| Gatm    | Slc16a2  |
| Gbp3    | Sqle     |
| Gbx2    | St6gal1  |
| Gca     | Tceal3   |
| Gcat    | Tcf7l1   |
| Gdf3    | Terc     |
| Gdpd5   | Tmem119  |
| Gin1    | Tnfrsf14 |
| Gja1    | Tspan17  |
| Gm10012 | Tstd3    |
| Gm14005 | Ubtd2    |
| Gm15915 | Ugt1a6b  |
| Gm16548 | Xlr3a    |
| Gm16907 | Zbp1     |
| Gm19705 | Zfp248   |
| Gm38670 |          |
| Gm5294  |          |
| Gm7120  |          |
| Gpr18   |          |
| Gpr25   |          |

Gpr84  
Gramd3  
Gzmb  
H2afy2  
Habp4  
Hbb-b2  
Hdc  
Helq  
Hist1h2ah  
Hist1h2be  
Hist1h3h  
Hist1h4h  
Hist1h4k  
Hist3h2ba  
Hist3h2bb-ps  
Hmga1-rs1  
Homer2  
Hopx  
Hotairm1  
Hoxaas3  
Hp  
Hpd1  
Hpse  
Hs6st2  
Hsd17b1  
Hvcn1  
I830077J02Rik  
Id1  
Ifitm1  
Igfbp7  
Il18r1  
Il1r1  
Il1r1l  
Il4ra  
Irf2bpl  
Jmjd7  
Kcne3  
Klrb1c  
Klrb1f



Klrd1  
LOC100041034  
LOC664787  
Lag3  
Ldhal6b  
Lmo1  
Lrg1  
Lrp11  
Lsr  
Ly6c1  
Mapk13  
Mapkapk2  
Matn2  
Mboat1  
Mcf2l  
Mchr1  
Mcpt8  
Mcts2  
Mgl2  
Mgst2  
Mir17hg  
Mmp14  
Moap1  
Mpzl3  
Ms4a2  
Ms4a3  
Mt1  
Mt2  
Mtus1  
Muc1  
Myd88  
Myo19  
Myo1e  
Naf1  
Npff  
Nr0b2  
Nrtn  
Nsf  
Ntn4

Nupr1  
Olfm1  
Oosp1  
Oosp2  
Opn3  
Osm  
Otulin  
Palm  
Papss2  
Pcdhgc3  
Pcsk9  
Pdcd1lg2  
Pdgfrb  
Pdia5  
Pdss1  
Perp  
Pgam2  
Pgs1  
Phlda1  
Pi16  
Pim2  
Plcd3  
Plekhh3  
Plod1  
Plod2  
Plscr1  
Plscr2  
Pmaip1  
Pnp2  
Podxl  
Ppfibp1  
Ppifos  
Ppp3cc  
Prodh  
Prom1  
Prps1  
Prss16  
Prss57  
Prtn3

Ptgir  
Ptpf  
Pvt1  
Rab26os  
Rab3il1  
Rab44  
Rbm3os  
Rcvrn  
Reep6  
Rgs10  
Rhbdl2  
Rhoj  
Ribc1  
Rpl30  
Rps6ka3  
Rras2  
Rtn4r  
Rundc3a  
S100a4  
S100a5  
S100a6  
S1pr3  
Samd14  
Sbno2  
Scgb3a1  
Selm  
Selp  
Sema4a  
Sema6b  
41161  
Serpine2  
Sgcb  
Sipa1l1  
Slc16a1  
Slc17a7  
Slc19a2  
Slc22a4  
Slc26a10  
Slc39a8

Slc4a8  
Slc7a8  
Slc9a2  
SlcUbl4a  
Sfn2  
Slpi  
Smim13  
Snhg10  
Snx24  
Socs2  
Sorl1  
Sparc  
Spint1  
Spire1  
Spire2  
Spsb1  
St6gal1  
Sulf2  
Sult2b1  
Syng1  
Syng4  
Tbrg4  
Tceal3  
Tcf7  
Tctex1d4  
Tctn1  
Tfrc  
Tgfb1  
Tgm1  
Tha1  
Tjp1  
Tmem132a  
Tmem147  
Tmem215  
Tomm6os  
Tpcn1  
Trem1  
Trim46  
Trpv4

Tspan17

Tspo

Tstd3

Ubxn11

Ugt1a6b

Vldlr

Wdfy1

Wfs1

Wipi1

Xlr3a

Xylb

Zbtb16

Zfp106

Znhit1

---

**Supplemental Table 3. Gene sets enriched in phenotype HJ compared to WT.**

| GS                                                                         | SIZE | ES   | NES  | NOM p-val | FDR q-val |
|----------------------------------------------------------------------------|------|------|------|-----------|-----------|
| 1 REACTOME_G1_S_TRANSITION                                                 | 103  | 0.71 | 2.02 | 0         | 0.002     |
| 2 REACTOME_SYNTHESIS_OF_DNA                                                | 90   | 0.72 | 2.02 | 0         | 0.001     |
| 3 REACTOME_ASSEMBLY_OF_THE_PRE_REPLICATIVE_COMPLEX                         | 63   | 0.74 | 1.99 | 0         | 0.002     |
| 4 REACTOME_M_G1_TRANSITION                                                 | 77   | 0.72 | 1.98 | 0         | 0.001     |
| 5 REACTOME_ORC1_REMOVAL_FROM_CHROMATIN                                     | 65   | 0.72 | 1.94 | 0         | 0.003     |
| 6 REACTOME_S_PHASE                                                         | 105  | 0.67 | 1.93 | 0         | 0.003     |
| 7 REACTOME_CELL_CYCLE_CHECKPOINTS                                          | 110  | 0.66 | 1.92 | 0         | 0.004     |
| 8 REACTOME_CYCLIN_E_ASSOCIATED_EVENTS_DURING_G1_S_TRANSITION_              | 61   | 0.7  | 1.91 | 0         | 0.004     |
| 9 REACTOME_DESTABILIZATION_OF_MRNA_BY_AUF1_HNRNP_D0                        | 50   | 0.73 | 1.9  | 0         | 0.004     |
| 10 REACTOME_MITOTIC_G1_G1_S_PHASES                                         | 127  | 0.65 | 1.89 | 0         | 0.005     |
| 11 REACTOME_SCF5KP2_MEDIATED_DEGRADATION_OF_P27_P21                        | 52   | 0.73 | 1.88 | 0         | 0.004     |
| 12 REACTOME_CDT1_ASSOCIATION_WITH_THE_CDC6_ORC_ORIGIN_COMPLEX              | 54   | 0.73 | 1.87 | 0         | 0.005     |
| 13 REACTOME_ASPARAGINE_N_LINKED_GLYCOSYLATION                              | 78   | 0.68 | 1.83 | 0         | 0.01      |
| 14 KEGG_AMINOACYL_TRNA_BIOSYNTHESIS                                        | 41   | 0.73 | 1.82 | 0         | 0.012     |
| 15 REACTOME_TRANSPORT_OF_MATURE_TRANSCRIPT_TO_CYTOPLASM                    | 52   | 0.7  | 1.82 | 0         | 0.012     |
| 16 REACTOME_P53_DEPENDENT_G1_DNA_DAMAGE_RESPONSE                           | 52   | 0.71 | 1.81 | 0         | 0.012     |
| 17 REACTOME_ACTIVATION_OF_ATR_IN_RESPONSE_TO_REPLICATION_STRESS            | 35   | 0.75 | 1.81 | 0.002     | 0.012     |
| 18 REACTOME_ER_PHAGOSOME_PATHWAY                                           | 53   | 0.71 | 1.81 | 0         | 0.012     |
| 19 REACTOME_AUTODEGRADATION_OF_THE_E3_UBIQUITIN_LIGASE_COP1                | 46   | 0.71 | 1.8  | 0         | 0.012     |
| 20 REACTOME_TRNA_AMINOACYLATION                                            | 42   | 0.72 | 1.8  | 0         | 0.012     |
| 21 REACTOME_ANTIGEN_PROCESSING_CROSS_PRESENTATION                          | 65   | 0.67 | 1.8  | 0         | 0.012     |
| 22 REACTOME_P53_INDEPENDENT_G1_S_DNA_DAMAGE_CHECKPOINT                     | 48   | 0.69 | 1.79 | 0         | 0.012     |
| 23 REACTOME_CROSS_PRESENTATION_OF_SOLUBLE_EXOGENOUS_ANTIGENS_ENDOSOMES     | 45   | 0.7  | 1.79 | 0.002     | 0.013     |
| 24 REACTOME_TRANSPORT_OF_MATURE_MRNA_DERIVED_FROM_AN_INTRONLESS_TRANSCRIPT | 32   | 0.74 | 1.78 | 0         | 0.014     |
| 25 REACTOME_VIF_MEDIATED_DEGRADATION_OF_APOBEC3G                           | 48   | 0.7  | 1.78 | 0.002     | 0.013     |
| 26 REACTOME_DNA_STRAND_ELONGATION                                          | 30   | 0.76 | 1.78 | 0         | 0.014     |

|    |                                                                                                                           |     |      |      |       |       |
|----|---------------------------------------------------------------------------------------------------------------------------|-----|------|------|-------|-------|
| 27 | REACTOME_MITOCHONDRIAL_PROTEIN_IMPORT                                                                                     | 46  | 0.7  | 1.77 | 0     | 0.017 |
| 28 | BIOCARTA_PROTEASOME_PATHWAY                                                                                               | 28  | 0.76 | 1.77 | 0     | 0.016 |
| 29 | REACTOME_HOST_INTERACTIONS_OF_HIV_FACTORS                                                                                 | 115 | 0.6  | 1.77 | 0     | 0.016 |
| 30 | REACTOME_CDK_MEDIATED_PHOSPHORYLATION_AND_REMOVAL_OF_CDC6                                                                 | 46  | 0.71 | 1.76 | 0     | 0.016 |
| 31 | REACTOME_METABOLISM_OF_NUCLEOTIDES                                                                                        | 69  | 0.65 | 1.76 | 0     | 0.016 |
| 32 | REACTOME_SCF_BETA_TRCP_MEDIATED_DEGRADATION_OF_EMI1                                                                       | 48  | 0.69 | 1.76 | 0     | 0.016 |
| 33 | KEGG_PROTEASOME                                                                                                           | 44  | 0.71 | 1.76 | 0     | 0.016 |
| 34 | KEGG_ANTIGEN_PROCESSING_AND_PRESENTATION                                                                                  | 50  | 0.68 | 1.76 | 0     | 0.015 |
| 35 | REACTOME_METABOLISM_OF_PROTEINS                                                                                           | 397 | 0.54 | 1.76 | 0     | 0.015 |
| 36 | REACTOME_G2_M_CHECKPOINTS                                                                                                 | 41  | 0.7  | 1.75 | 0.002 | 0.018 |
| 37 | REACTOME_METABOLISM_OF_NON_CODING_RNA                                                                                     | 47  | 0.7  | 1.75 | 0     | 0.018 |
| 38 | REACTOME_REGULATION_OF_MRNA_STABILITY_BY_PROTEINS_THAT_BIND_AU_RICH_ELEMENTS                                              | 81  | 0.63 | 1.74 | 0     | 0.018 |
| 39 | REACTOME_INTERACTIONS_OF_VPR_WITH_HOST_CELLULAR_PROTEINS                                                                  | 31  | 0.74 | 1.74 | 0     | 0.018 |
| 40 | REACTOME_DNA_REPLICATION                                                                                                  | 184 | 0.57 | 1.74 | 0     | 0.018 |
| 41 | REACTOME_POST_TRANSLATIONAL_PROTEIN_MODIFICATION                                                                          | 167 | 0.57 | 1.74 | 0     | 0.018 |
| 42 | REACTOME_PURINE_METABOLISM                                                                                                | 32  | 0.74 | 1.73 | 0.002 | 0.018 |
| 43 | REACTOME_REGULATION_OF_GLUKOKINASE_BY_GLUKOKINASE_REGULATORY_PROTEIN                                                      | 27  | 0.76 | 1.73 | 0.004 | 0.018 |
| 44 | REACTOME_RESPIRATORY_ELECTRON_TRANSPORT_ATP_SYNTHESIS_BY_CHEMIOSMOTIC_COUPLING_AND_HEAT_PRODUCTION_BY_UNCOUPLING_PROTEINS | 77  | 0.65 | 1.73 | 0     | 0.018 |
| 45 | REACTOME_TRANSPORT_OF_RIBONUCLEOPROTEINS_INTO_THE_HOST_NUCLEUS                                                            | 27  | 0.75 | 1.73 | 0.002 | 0.019 |
| 46 | REACTOME_GLUCOSE_TRANSPORT                                                                                                | 38  | 0.7  | 1.72 | 0.004 | 0.019 |
| 47 | REACTOME_NEP_NS2_INTERACTS_WITH_THE_CELLULAR_EXPORT_MACHINERY                                                             | 27  | 0.76 | 1.72 | 0.004 | 0.019 |
| 48 | REACTOME_REGULATION_OF_ORNITHINE_DECARBOXYLASE_ODC                                                                        | 48  | 0.67 | 1.71 | 0.004 | 0.022 |
| 49 | REACTOME_EXTENSION_OF_TELOMERES                                                                                           | 27  | 0.73 | 1.71 | 0.008 | 0.024 |
| 50 | KEGG_DNA_REPLICATION                                                                                                      | 35  | 0.72 | 1.7  | 0.008 | 0.024 |
| 51 | REACTOME_PROCESSING_OF_CAPPED_INTRON_CONTAINING_PRE_MRNA                                                                  | 134 | 0.58 | 1.7  | 0     | 0.025 |
| 52 | REACTOME_MRNA_PROCESSING                                                                                                  | 151 | 0.57 | 1.7  | 0     | 0.024 |
| 53 | REACTOME_METABOLISM_OF_AMINO_ACIDS_AND_DERIVATIVES                                                                        | 190 | 0.55 | 1.7  | 0     | 0.024 |
| 54 | REACTOME_E2F_MEDIATED_REGULATION_OF_DNA_REPLICATION                                                                       | 32  | 0.72 | 1.69 | 0.002 | 0.025 |

|    |                                                                                                                       |     |      |      |       |       |
|----|-----------------------------------------------------------------------------------------------------------------------|-----|------|------|-------|-------|
| 55 | REACTOME_SIGNALING_BY_WNT                                                                                             | 61  | 0.64 | 1.69 | 0     | 0.025 |
| 56 | REACTOME_AUTODEGRADATION_OF_CDH1_BY_CDH1_APC_C                                                                        | 56  | 0.65 | 1.69 | 0.004 | 0.025 |
| 57 | REACTOME_ACTIVATION_OF_THE_PRE_REPLICATIVE_COMPLEX                                                                    | 29  | 0.74 | 1.69 | 0.002 | 0.026 |
| 58 | REACTOME_CYTOSOLIC_TRNA_AMINOACYLATION                                                                                | 24  | 0.77 | 1.69 | 0.002 | 0.025 |
| 59 | KEGG_TERPENOID_BACKBONE_BIOSYNTHESIS                                                                                  | 15  | 0.84 | 1.69 | 0.002 | 0.027 |
| 60 | REACTOME_ACTIVATED_POINT_MUTANTS_OF_FGFR2                                                                             | 16  | 0.82 | 1.68 | 0.006 | 0.027 |
| 61 | REACTOME_AMINE_DERIVED_HORMONES                                                                                       | 15  | 0.83 | 1.68 | 0     | 0.027 |
| 62 | REACTOME_RESPIRATORY_ELECTRON_TRANSPORT                                                                               | 62  | 0.63 | 1.68 | 0.005 | 0.028 |
| 63 | REACTOME_APC_C_CDH1_MEDIATED_DEGRADATION_OF_CDC20_AND_OTHER_APC_C_CDH1_TARGETE<br>D_PROTEINS_IN_LATE_MITOSIS_EARLY_G1 | 64  | 0.63 | 1.67 | 0.002 | 0.03  |
| 64 | REACTOME_ACTIVATION_OF_NF_KAPPAB_IN_B_CELLS                                                                           | 60  | 0.64 | 1.66 | 0.004 | 0.032 |
| 65 | REACTOME_IL_RECEPTOR_SHC_SIGNALING                                                                                    | 27  | 0.73 | 1.66 | 0.011 | 0.033 |
| 66 | REACTOME_RNA_POL_I_PROMOTER_OPENING                                                                                   | 44  | 0.67 | 1.65 | 0.002 | 0.036 |
| 67 | REACTOME_TCA_CYCLE_AND_RESPIRATORY_ELECTRON_TRANSPORT                                                                 | 112 | 0.57 | 1.65 | 0     | 0.036 |
| 68 | REACTOME_MITOTIC_M_M_G1_PHASES                                                                                        | 164 | 0.55 | 1.65 | 0     | 0.036 |
| 69 | KEGG_CITRATE_CYCLE_TCA_CYCLE                                                                                          | 28  | 0.72 | 1.65 | 0.006 | 0.036 |
| 70 | PID_UPA_UPAR_PATHWAY                                                                                                  | 42  | 0.67 | 1.65 | 0.002 | 0.038 |
| 71 | KEGG_GLYCINE_SERINE_AND_THREONINE_METABOLISM                                                                          | 31  | 0.69 | 1.64 | 0.006 | 0.039 |
| 72 | REACTOME_HIV_INFECTION                                                                                                | 179 | 0.54 | 1.63 | 0     | 0.042 |
| 73 | REACTOME_APC_C_CDC20_MEDIATED_DEGRADATION_OF_MITOTIC_PROTEINS                                                         | 65  | 0.61 | 1.63 | 0.002 | 0.043 |
| 74 | REACTOME_CELL_CYCLE_MITOTIC                                                                                           | 300 | 0.51 | 1.63 | 0     | 0.043 |
| 75 | REACTOME_LATE_PHASE_OF_HIV_LIFE_CYCLE                                                                                 | 92  | 0.58 | 1.63 | 0.002 | 0.043 |
| 76 | REACTOME_TELOMERE_MAINTENANCE                                                                                         | 62  | 0.62 | 1.63 | 0.006 | 0.044 |
| 77 | REACTOME_CELL_CYCLE                                                                                                   | 377 | 0.49 | 1.63 | 0     | 0.043 |
| 78 | KEGG_SPLICEOSOME                                                                                                      | 121 | 0.56 | 1.61 | 0     | 0.05  |
| 79 | PID_E2F_PATHWAY                                                                                                       | 69  | 0.6  | 1.61 | 0     | 0.051 |
| 80 | REACTOME_STEROID_HORMONES                                                                                             | 27  | 0.69 | 1.61 | 0.006 | 0.051 |
| 81 | REACTOME_REGULATION_OF_MITOTIC_CELL_CYCLE                                                                             | 76  | 0.59 | 1.61 | 0.002 | 0.052 |
| 82 | REACTOME_TRANSPORT_TO_THE_GOLGI_AND_SUBSEQUENT_MODIFICATION                                                           | 32  | 0.68 | 1.6  | 0.008 | 0.056 |



|     |                                                                   |     |      |      |       |       |
|-----|-------------------------------------------------------------------|-----|------|------|-------|-------|
| 83  | KEGG_ARGININE_AND_PROLINE_METABOLISM                              | 49  | 0.63 | 1.6  | 0.012 | 0.056 |
| 84  | REACTOME_ABC_FAMILY_PROTEINS_MEDIATED_TRANSPORT                   | 29  | 0.7  | 1.59 | 0.013 | 0.061 |
| 85  | REACTOME_AMYLOIDS                                                 | 61  | 0.61 | 1.58 | 0.008 | 0.063 |
| 86  | REACTOME_G1_S_SPECIFIC_TRANSCRIPTION                              | 17  | 0.76 | 1.58 | 0.015 | 0.068 |
| 87  | REACTOME_CITRIC_ACID_CYCLE_TCA_CYCLE                              | 18  | 0.75 | 1.56 | 0.023 | 0.077 |
| 88  | REACTOME_METABOLISM_OF_STEROID_HORMONES_AND_VITAMINS_A_AND_D      | 32  | 0.67 | 1.56 | 0.019 | 0.076 |
| 89  | REACTOME_TRANSCRIPTION                                            | 175 | 0.52 | 1.56 | 0     | 0.076 |
| 90  | REACTOME_LAGGING_STRAND_SYNTHESIS                                 | 19  | 0.74 | 1.56 | 0.02  | 0.079 |
| 91  | KEGG_SYSTEMIC_LUPUS_ERYTHEMATOSUS                                 | 92  | 0.55 | 1.56 | 0.004 | 0.079 |
| 92  | KEGG_SELENOAMINO_ACID_METABOLISM                                  | 25  | 0.69 | 1.55 | 0.012 | 0.081 |
| 93  | BIOCARTA_MCM_PATHWAY                                              | 17  | 0.77 | 1.55 | 0.015 | 0.082 |
| 94  | REACTOME_SYNTHESIS_SECRETION_AND_INACTIVATION_OF_GLP1             | 17  | 0.75 | 1.55 | 0.033 | 0.086 |
| 95  | KEGG_MISMATCH_REPAIR                                              | 22  | 0.71 | 1.54 | 0.023 | 0.086 |
| 96  | REACTOME_INCRETIN_SYNTHESIS_SECRETION_AND_INACTIVATION            | 20  | 0.72 | 1.54 | 0.019 | 0.087 |
| 97  | KEGG_N_GLYCAN_BIOSYNTHESIS                                        | 44  | 0.62 | 1.54 | 0.004 | 0.089 |
| 98  | REACTOME_MRNA_SPLICING                                            | 105 | 0.53 | 1.54 | 0.004 | 0.09  |
| 99  | PID_ATR_PATHWAY                                                   | 39  | 0.63 | 1.53 | 0.021 | 0.091 |
| 100 | REACTOME_DIABETES_PATHWAYS                                        | 120 | 0.52 | 1.53 | 0.002 | 0.094 |
| 101 | REACTOME_PACKAGING_OF_TELOMERE_ENDS                               | 35  | 0.63 | 1.53 | 0.024 | 0.097 |
| 102 | KEGG_OXIDATIVE_PHOSPHORYLATION                                    | 112 | 0.52 | 1.52 | 0.002 | 0.102 |
| 103 | REACTOME_HIV_LIFE_CYCLE                                           | 105 | 0.53 | 1.52 | 0.011 | 0.103 |
| 104 | REACTOME_UNFOLDED_PROTEIN_RESPONSE                                | 73  | 0.56 | 1.51 | 0.015 | 0.107 |
| 105 | REACTOME_SLC_MEDIATED_TRANSMEMBRANE_TRANSPORT                     | 233 | 0.48 | 1.51 | 0     | 0.109 |
| 106 | REACTOME_PROCESSIVE_SYNTHESIS_ON_THE_LAGGING_STRAND               | 15  | 0.74 | 1.5  | 0.03  | 0.115 |
| 107 | REACTOME_MEIOTIC_RECOMBINATION                                    | 66  | 0.57 | 1.5  | 0.009 | 0.114 |
| 108 | REACTOME_N_GLYCAN_ANTENNAE_ELONGATION_IN_THE_MEDIAL_TRANS_GOLGI   | 18  | 0.73 | 1.5  | 0.05  | 0.116 |
| 109 | REACTOME_METABOLISM_OF_RNA                                        | 249 | 0.46 | 1.5  | 0     | 0.115 |
| 110 | REACTOME_CLEAVAGE_OF_GROWING_TRANSCRIPT_IN_THE_TERMINATION_REGION | 41  | 0.61 | 1.49 | 0.029 | 0.123 |
| 111 | NABA_ECM_REGULATORS                                               | 212 | 0.48 | 1.49 | 0     | 0.128 |

|                                                                                    |     |      |      |       |       |
|------------------------------------------------------------------------------------|-----|------|------|-------|-------|
| 112 KEGG_LYSOSOME                                                                  | 117 | 0.51 | 1.48 | 0.012 | 0.13  |
| 113 REACTOME_MRNA_SPLICING_MINOR_PATHWAY                                           | 41  | 0.6  | 1.48 | 0.021 | 0.136 |
| 114 KEGG_ABC_TRANSPORTERS                                                          | 40  | 0.6  | 1.47 | 0.026 | 0.137 |
| 115 REACTOME_SYNTHESIS_AND_INTERCONVERSION_OF_NUCLEOTIDE_DI_AND_TRIPHOSPHATES      | 17  | 0.73 | 1.47 | 0.048 | 0.139 |
| 116 C                                                                              | 15  | 0.75 | 1.47 | 0.044 | 0.139 |
| 117 REACTOME_MRNA_3_END_PROCESSING                                                 | 33  | 0.62 | 1.47 | 0.026 | 0.138 |
| 118 REACTOME_RNA_POL_I_RNA_POL_III_AND_MITOCHONDRIAL_TRANSCRIPTION                 | 99  | 0.51 | 1.46 | 0.021 | 0.151 |
| 119 PID_MYC_ACTIV_PATHWAY                                                          | 77  | 0.53 | 1.46 | 0.006 | 0.15  |
| 120 REACTOME_RNA_POL_II_TRANSCRIPTION                                              | 91  | 0.52 | 1.46 | 0.008 | 0.15  |
| 121 REACTOME_INFLUENZA_LIFE_CYCLE                                                  | 131 | 0.49 | 1.45 | 0.007 | 0.153 |
| 122 KEGG_OTHER_GLYCAN_DEGRADATION                                                  | 16  | 0.71 | 1.45 | 0.036 | 0.155 |
| 123 REACTOME_TRANSLATION                                                           | 138 | 0.49 | 1.45 | 0.004 | 0.156 |
| 124 REACTOME_REGULATION_OF_apoptosis                                               | 56  | 0.55 | 1.45 | 0.025 | 0.157 |
| 125 REACTOME_ACTIVATION_OF_chaperone_GENES_BY_XBP1S                                | 42  | 0.58 | 1.45 | 0.023 | 0.157 |
| 126 REACTOME_RNA_POL_I_TRANSCRIPTION                                               | 68  | 0.54 | 1.44 | 0.025 | 0.158 |
| 127 KEGG_apoptosis                                                                 | 79  | 0.52 | 1.44 | 0.011 | 0.159 |
| 128 KEGG_GALACTOSE_METABOLISM                                                      | 25  | 0.64 | 1.44 | 0.045 | 0.158 |
| 129 REACTOME_TRANSMEMBRANE_TRANSPORT_OF_SMALL_MOLECULES                            | 391 | 0.43 | 1.44 | 0     | 0.164 |
| 130 REACTOME_TAK1_ACTIVATES_NFKB_BY_PHOSPHORYLATION_AND_ACTIVATION_OF_IKKS_COMPLEX | 22  | 0.66 | 1.43 | 0.04  | 0.164 |
| 131 REACTOME_TRANSCRIPTION_COUPLED_NER_TC_NER                                      | 43  | 0.58 | 1.43 | 0.034 | 0.166 |
| 132 PID_FANCONI_PATHWAY                                                            | 45  | 0.57 | 1.42 | 0.038 | 0.175 |
| 133 REACTOME_DEPOSITION_OF_NEW_CENPA_CONTAINING_NUCLEOSOMES_AT_THE_CENTROMERE      | 50  | 0.55 | 1.42 | 0.041 | 0.176 |
| 134 REACTOME_EXTRACELLULAR_MATRIX_ORGANIZATION                                     | 79  | 0.51 | 1.42 | 0.019 | 0.175 |
| 135 RIDE_LLO_AND_TRANSFER_TO_A_NASCENT_PROTEIN                                     | 27  | 0.62 | 1.41 | 0.043 | 0.18  |
| 136 KEGG_HISTIDINE_METABOLISM                                                      | 27  | 0.62 | 1.41 | 0.049 | 0.179 |
| 137 KEGG_PYRIMIDINE_METABOLISM                                                     | 95  | 0.5  | 1.41 | 0.017 | 0.18  |
| 138 REACTOME_CHROMOSOME_MAINTENANCE                                                | 104 | 0.49 | 1.4  | 0.002 | 0.186 |
| 139 REACTOME_FORMATION_OF_FIBRIN_CLOT_CLOTTING_CASCADE                             | 31  | 0.59 | 1.4  | 0.049 | 0.189 |

|     |                                              |     |      |      |       |       |
|-----|----------------------------------------------|-----|------|------|-------|-------|
| 140 | REACTOME_TRANS_GOLGI_NETWORK_VESICLE_BUDDING | 54  | 0.53 | 1.38 | 0.042 | 0.216 |
| 141 | REACTOME_G_ALPHA_I_SIGNALLING_EVENTS         | 176 | 0.45 | 1.37 | 0.014 | 0.226 |
| 142 | REACTOME_MEMBRANE_TRAFFICKING                | 117 | 0.47 | 1.36 | 0.023 | 0.235 |
| 143 | KEGG_PARKINSONS_DISEASE                      | 109 | 0.48 | 1.36 | 0.029 | 0.237 |
| 144 | REACTOME_CLASS_A1_RHODOPSIN_LIKE_RECEPTORS   | 263 | 0.42 | 1.35 | 0.002 | 0.247 |

---

**Supplemental Table 4. Gene sets enriched in phenotype HJ compared to J (LSK).**

| GS                                                             | SIZE | ES   | NES  | NOM p-val | FDR q-val |
|----------------------------------------------------------------|------|------|------|-----------|-----------|
| 1 REACTOME_SYNTHESIS_OF_DNA                                    | 90   | 0.72 | 2.03 | 0         | 0.005     |
| 2 REACTOME_M_G1_TRANSITION                                     | 77   | 0.72 | 2    | 0         | 0.006     |
| 3 REACTOME_S_PHASE                                             | 105  | 0.69 | 2    | 0         | 0.004     |
| 4 REACTOME_G1_S_TRANSITION                                     | 103  | 0.68 | 1.98 | 0         | 0.006     |
| 5 REACTOME_ASSEMBLY_OF_THE_PRE_REPLICATIVE_COMPLEX             | 63   | 0.74 | 1.97 | 0         | 0.005     |
| 6 REACTOME_CHOLESTEROL_BIOSYNTHESIS                            | 20   | 0.89 | 1.96 | 0         | 0.005     |
| 7 REACTOME_ORC1_REMOVAL_FROM_CHROMATIN                         | 65   | 0.72 | 1.94 | 0         | 0.006     |
| 8 REACTOME_CDT1_ASSOCIATION_WITH_THE_CDC6_ORC_ORIGIN_COMPLEX   | 54   | 0.73 | 1.92 | 0         | 0.009     |
| 9 REACTOME_RNA_POL_I_PROMOTER_OPENING                          | 44   | 0.75 | 1.9  | 0         | 0.01      |
| 10 REACTOME_MITOTIC_G1_G1_S_PHASES                             | 127  | 0.63 | 1.9  | 0         | 0.009     |
| 11 REACTOME_DESTABILIZATION_OF_MRNA_BY_AUF1_HNRNP_D0           | 50   | 0.72 | 1.88 | 0         | 0.011     |
| 12 REACTOME_DNA_STRAND_ELONGATION                              | 30   | 0.79 | 1.86 | 0         | 0.013     |
| 13 BIOCARTA_MCM_PATHWAY                                        | 17   | 0.87 | 1.85 | 0         | 0.014     |
| 14 REACTOME_CYCLIN_E_ASSOCIATED_EVENTS_DURING_G1_S_TRANSITION_ | 61   | 0.68 | 1.83 | 0         | 0.02      |
| 15 REACTOME_ANTIGEN_PROCESSING_CROSS_PRESENTATION              | 65   | 0.68 | 1.82 | 0         | 0.02      |
| 16 REACTOME_CDK_MEDIATED_PHOSPHORYLATION_AND_REMOVAL_OF_CDC6   | 46   | 0.71 | 1.82 | 0         | 0.02      |
| 17 REACTOME_VIF_MEDIATED_DEGRADATION_OF_APOBEC3G               | 48   | 0.69 | 1.81 | 0.002     | 0.02      |
| 18 REACTOME_ACTIVATION_OF_THE_PRE_REPLICATIVE_COMPLEX          | 29   | 0.78 | 1.81 | 0         | 0.019     |
| 19 KEGG_DNA_REPLICATION                                        | 35   | 0.75 | 1.81 | 0         | 0.019     |
| 20 KEGG_ANTIGEN_PROCESSING_AND_PRESENTATION                    | 50   | 0.7  | 1.81 | 0         | 0.018     |
| 21 REACTOME_AUTODEGRADATION_OF_THE_E3_UBIQUITIN_LIGASE_COP1    | 46   | 0.7  | 1.81 | 0.004     | 0.017     |
| 22 REACTOME_P53_DEPENDENT_G1_DNA_DAMAGE_RESPONSE               | 52   | 0.7  | 1.8  | 0.004     | 0.019     |
| 23 REACTOME_ER_PHAGOSOME_PATHWAY                               | 53   | 0.7  | 1.8  | 0         | 0.019     |

|    |                                                              |     |      |      |       |       |
|----|--------------------------------------------------------------|-----|------|------|-------|-------|
| 24 | REACTOME_TRANSLATION                                         | 138 | 0.59 | 1.79 | 0     | 0.019 |
| 25 | REACTOME_INFLUENZA_LIFE_CYCLE                                | 131 | 0.59 | 1.78 | 0     | 0.022 |
| 26 | REACTOME_ACTIVATION_OF_ATR_IN_RESPONSE_TO_REPLICATION_STRESS | 35  | 0.73 | 1.76 | 0.002 | 0.024 |
| 27 | REACTOME_MEIOTIC_RECOMBINATION                               | 66  | 0.66 | 1.76 | 0     | 0.025 |
| 28 | REACTOME_SCFSKP2_MEDIATED_DEGRADATION_OF_P27_P21             | 52  | 0.68 | 1.76 | 0.002 | 0.025 |
| 29 | REACTOME_REGULATION_OF_apoptosis                             | 56  | 0.66 | 1.75 | 0.002 | 0.025 |
| 30 | REACTOME_CROSS_PRESENTATION_OF_SOLUBLE_EXOGENOUS_ANTIGENS_E  | 45  | 0.68 | 1.75 | 0     | 0.025 |
| 31 | KEGG_PROTEASOME                                              | 44  | 0.7  | 1.75 | 0.002 | 0.026 |
| 32 | KEGG_SYSTEMIC_LUPUS_ERYTHEMATOSUS                            | 92  | 0.62 | 1.74 | 0     | 0.027 |
| 33 | BIOCARTA_PROTEASOME_PATHWAY                                  | 28  | 0.72 | 1.74 | 0.004 | 0.027 |
| 34 | KEGG_SPLICEOSOME                                             | 121 | 0.59 | 1.73 | 0     | 0.028 |
| 35 | REACTOME_P53_INDEPENDENT_G1_S_DNA_DAMAGE_CHECKPOINT          | 48  | 0.68 | 1.73 | 0     | 0.027 |
| 36 | REACTOME_SRP_DEPENDENT_COTRANSLATIONAL_PROTEIN_TARGETING_TO_ | 103 | 0.6  | 1.73 | 0     | 0.027 |
| 37 | REACTOME_STEROID_HORMONES                                    | 27  | 0.73 | 1.73 | 0     | 0.027 |
| 38 | REACTOME_TELOMERE_MAINTENANCE                                | 62  | 0.64 | 1.72 | 0.002 | 0.028 |
| 39 | REACTOME_METABOLISM_OF_STEROID_HORMONES_AND_VITAMINS_A_AND_I | 32  | 0.73 | 1.72 | 0.002 | 0.028 |
| 40 | REACTOME_SCF_BETA_TRCP_MEDIATED_DEGRADATION_OF_EMI1          | 48  | 0.67 | 1.72 | 0     | 0.027 |
| 41 | REACTOME_NUCLEOTIDE_EXCISION_REPAIR                          | 48  | 0.67 | 1.72 | 0.004 | 0.027 |
| 42 | REACTOME_CELL_CYCLE_CHECKPOINTS                              | 110 | 0.58 | 1.71 | 0     | 0.028 |
| 43 | REACTOME_TRANSCRIPTION_COUPLED_NER_TC_NER                    | 43  | 0.67 | 1.71 | 0.002 | 0.028 |
| 44 | REACTOME_AMYLOIDS                                            | 61  | 0.64 | 1.7  | 0.005 | 0.031 |
| 45 | KEGG_PORPHYRIN_AND_CHLOROPHYLL_METABOLISM                    | 29  | 0.73 | 1.7  | 0.002 | 0.031 |
| 46 | REACTOME_GLOBAL_GENOMIC_NER_GG_NER                           | 32  | 0.72 | 1.69 | 0.011 | 0.031 |
| 47 | REACTOME_EXTENSION_OF_TELOMERES                              | 27  | 0.74 | 1.69 | 0.002 | 0.031 |
| 48 | REACTOME_PACKAGING_OF_TELOMERE_ENDS                          | 35  | 0.7  | 1.68 | 0.002 | 0.035 |
| 49 | REACTOME_METABOLISM_OF_PROTEINS                              | 397 | 0.5  | 1.67 | 0     | 0.037 |

|    |                                                                |     |      |      |       |       |
|----|----------------------------------------------------------------|-----|------|------|-------|-------|
| 50 | REACTOME_3_UTR_MEDIATED_TRANSLATIONAL_REGULATION               | 99  | 0.58 | 1.67 | 0.004 | 0.037 |
| 51 | REACTOME_TRANSCRIPTION                                         | 175 | 0.53 | 1.66 | 0     | 0.038 |
| 52 | REACTOME_VOLTAGE_GATED_POTASSIUM_CHANNELS                      | 43  | 0.65 | 1.66 | 0.004 | 0.04  |
| 53 | REACTOME_RNA_POL_I_TRANSCRIPTION                               | 68  | 0.61 | 1.65 | 0.005 | 0.043 |
| 54 | REACTOME_MITOCHONDRIAL_PROTEIN_IMPORT                          | 46  | 0.64 | 1.64 | 0.004 | 0.048 |
| 55 | REACTOME_G1_S_SPECIFIC_TRANSCRIPTION                           | 17  | 0.78 | 1.63 | 0.002 | 0.05  |
| 56 | REACTOME_METABOLISM_OF_NON_CODING_RNA                          | 47  | 0.63 | 1.63 | 0.005 | 0.05  |
| 57 | REACTOME_LATE_PHASE_OF_HIV_LIFE_CYCLE                          | 92  | 0.57 | 1.62 | 0.002 | 0.051 |
| 58 | REACTOME_REGULATION_OF_ORNITHINE_DECARBOXYLASE_ODC             | 48  | 0.63 | 1.62 | 0.011 | 0.052 |
| 59 | KEGG_NUCLEOTIDE_EXCISION_REPAIR                                | 43  | 0.63 | 1.62 | 0.011 | 0.052 |
| 60 | REACTOME_INFLUENZA_VIRAL_RNA_TRANSCRIPTION_AND_REPLICATION     | 97  | 0.56 | 1.62 | 0.005 | 0.052 |
| 61 | REACTOME_FANCONI_ANEMIA_PATHWAY                                | 19  | 0.76 | 1.62 | 0.015 | 0.051 |
| 62 | REACTOME_G2_M_CHECKPOINTS                                      | 41  | 0.65 | 1.62 | 0.002 | 0.051 |
| 63 | KEGG_STEROID_BIOSYNTHESIS                                      | 15  | 0.79 | 1.61 | 0.011 | 0.055 |
| 64 | REACTOME_PROCESSING_OF_CAPPED_INTRON_CONTAINING_PRE_MRNA       | 134 | 0.53 | 1.61 | 0     | 0.055 |
| 65 | REACTOME_HOST_INTERACTIONS_OF_HIV_FACTORS                      | 115 | 0.55 | 1.6  | 0.002 | 0.055 |
| 66 | REACTOME_METABOLISM_OF_RNA                                     | 249 | 0.5  | 1.6  | 0     | 0.056 |
| 67 | REACTOME_HIV_INFECTIION                                        | 179 | 0.52 | 1.6  | 0     | 0.056 |
| 68 | REACTOME_E2F_MEDIATED_REGULATION_OF_DNA_REPLICATION            | 32  | 0.66 | 1.59 | 0.017 | 0.061 |
| 69 | PID_HIF1A_PATHWAY                                              | 18  | 0.75 | 1.59 | 0.026 | 0.061 |
| 70 | REACTOME_DEPOSITION_OF_NEW_CENPA_CONTAINING_NUCLEOSOMES_AT_    | 50  | 0.61 | 1.59 | 0.006 | 0.06  |
| 71 | REACTOME_AUTODEGRADATION_OF_CDH1_BY_CDH1_APC_C                 | 56  | 0.59 | 1.58 | 0.009 | 0.061 |
| 72 | REACTOME_RNA_POL_I_RNA_POL_III_AND_MITOCHONDRIAL_TRANSCRIPTION | 99  | 0.55 | 1.58 | 0     | 0.061 |
| 73 | REACTOME_MRNA_PROCESSING                                       | 151 | 0.52 | 1.58 | 0     | 0.063 |
| 74 | KEGG_TERPENOID_BACKBONE_BIOSYNTHESIS                           | 15  | 0.79 | 1.58 | 0.015 | 0.064 |
| 75 | REACTOME_TRNA_AMINOACYLATION                                   | 42  | 0.62 | 1.57 | 0.011 | 0.066 |

|     |                                                                |     |      |      |       |       |
|-----|----------------------------------------------------------------|-----|------|------|-------|-------|
| 76  | REACTOME_LAGGING_STRAND_SYNTHESIS                              | 19  | 0.74 | 1.56 | 0.024 | 0.069 |
| 77  | REACTOME_DNA_REPAIR                                            | 101 | 0.55 | 1.56 | 0.005 | 0.069 |
| 78  | KEGG_RIBOSOME                                                  | 84  | 0.55 | 1.56 | 0.004 | 0.071 |
| 79  | REACTOME_ASPARAGINE_N_LINKED_GLYCOSYLATION                     | 78  | 0.57 | 1.55 | 0.016 | 0.074 |
| 80  | REACTOME_REGULATION_OF_MRNA_STABILITY_BY_PROTEINS_THAT_BIND_AL | 81  | 0.55 | 1.54 | 0.007 | 0.082 |
| 81  | REACTOME_PEPTIDE_CHAIN_ELONGATION                              | 81  | 0.55 | 1.54 | 0.011 | 0.081 |
| 82  | KEGG_MISMATCH_REPAIR                                           | 22  | 0.71 | 1.54 | 0.024 | 0.083 |
| 83  | REACTOME_REGULATION_OF_GLUCOKINASE_BY_GLUCOKINASE_REGULATOR    | 27  | 0.66 | 1.53 | 0.016 | 0.087 |
| 84  | REACTOME_NEP_NS2_INTERACTS_WITH_THE_CELLULAR_EXPORT_MACHINER   | 27  | 0.66 | 1.53 | 0.02  | 0.089 |
| 85  | REACTOME_TRANSPORT_OF_MATURE_TRANSCRIPT_TO_CYTOPLASM           | 52  | 0.58 | 1.52 | 0.021 | 0.089 |
| 86  | REACTOME_CYTOSOLIC_TRNA_AMINOACYLATION                         | 24  | 0.68 | 1.52 | 0.031 | 0.09  |
| 87  | KEGG_TRYPTOPHAN_METABOLISM                                     | 39  | 0.61 | 1.52 | 0.019 | 0.09  |
| 88  | REACTOME_RNA_POL_II_TRANSCRIPTION                              | 91  | 0.53 | 1.52 | 0.005 | 0.093 |
| 89  | REACTOME_ACTIVATION_OF_NF_KAPPAB_IN_B_CELLS                    | 60  | 0.56 | 1.51 | 0.013 | 0.093 |
| 90  | KEGG_GLYCINE_SERINE_AND_THREONINE_METABOLISM                   | 31  | 0.65 | 1.51 | 0.018 | 0.095 |
| 91  | REACTOME_MRNA_SPLICING_MINOR_PATHWAY                           | 41  | 0.61 | 1.5  | 0.024 | 0.099 |
| 92  | REACTOME_PROCESSIVE_SYNTHESIS_ON_THE_LAGGING_STRAND            | 15  | 0.74 | 1.5  | 0.042 | 0.099 |
| 93  | REACTOME_METABOLISM_OF_MRNA                                    | 205 | 0.48 | 1.5  | 0     | 0.104 |
| 94  | REACTOME_MRNA_SPLICING                                         | 105 | 0.51 | 1.49 | 0.009 | 0.107 |
| 95  | REACTOME_OXYGEN_DEPENDENT_PROLINE_HYDROXYLATION_OF_HYPOXIA_I   | 15  | 0.74 | 1.49 | 0.036 | 0.107 |
| 96  | REACTOME_HIV_LIFE_CYCLE                                        | 105 | 0.51 | 1.48 | 0.007 | 0.112 |
| 97  | REACTOME_MEIOSIS                                               | 93  | 0.53 | 1.48 | 0.015 | 0.112 |
| 98  | REACTOME_SIGNALING_BY_WNT                                      | 61  | 0.56 | 1.48 | 0.03  | 0.114 |
| 99  | KEGG_SELENOAMINO_ACID_METABOLISM                               | 25  | 0.64 | 1.47 | 0.032 | 0.12  |
| 100 | REACTOME_FORMATION_OF_RNA_POL_II_ELONGATION_COMPLEX_           | 35  | 0.59 | 1.46 | 0.026 | 0.129 |
| 101 | REACTOME_TRANSPORT_OF_RIBONUCLEOPROTEINS_INTO_THE_HOST_NUCLI   | 27  | 0.61 | 1.46 | 0.045 | 0.132 |

|     |                                                                |     |      |      |       |       |
|-----|----------------------------------------------------------------|-----|------|------|-------|-------|
| 102 | KEGG_CITRATE_CYCLE_TCA_CYCLE                                   | 28  | 0.63 | 1.45 | 0.041 | 0.134 |
| 103 | REACTOME_TRANSPORT_OF_MATURE_MRNA_DERIVED_FROM_AN_INTRONLESS   | 32  | 0.61 | 1.45 | 0.041 | 0.135 |
| 104 | KEGG_HISTIDINE_METABOLISM                                      | 27  | 0.62 | 1.45 | 0.047 | 0.137 |
| 105 | KEGG_AMINOACYL_TRNA_BIOSYNTHESIS                               | 41  | 0.57 | 1.44 | 0.029 | 0.143 |
| 106 | REACTOME_METABOLISM_OF_VITAMINS_AND_COFACTORS                  | 50  | 0.55 | 1.44 | 0.03  | 0.143 |
| 107 | REACTOME_POTASSIUM_CHANNELS                                    | 97  | 0.5  | 1.43 | 0.007 | 0.149 |
| 108 | REACTOME_METABOLISM_OF_AMINO_ACIDS_AND_DERIVATIVES             | 190 | 0.45 | 1.41 | 0.01  | 0.163 |
| 109 | REACTOME_MEIOTIC_SYNAPSIS                                      | 58  | 0.53 | 1.41 | 0.024 | 0.172 |
| 110 | KEGG_N_GLYCAN_BIOSYNTHESIS                                     | 44  | 0.55 | 1.4  | 0.044 | 0.175 |
| 111 | KEGG_GLUTATHIONE_METABOLISM                                    | 48  | 0.55 | 1.4  | 0.037 | 0.174 |
| 112 | REACTOME_NONSENSE_MEDIATED_DECAY_ENHANCED_BY_THE_EXON_JUNCTION | 102 | 0.48 | 1.4  | 0.022 | 0.178 |
| 113 | REACTOME_CHEMOKINE_RECEPTORS_BIND_CHEMOKINES                   | 44  | 0.54 | 1.39 | 0.042 | 0.181 |
| 114 | REACTOME_APC_C_CDH1_MEDIATED_DEGRADATION_OF_CDC20_AND_OTHER    | 64  | 0.51 | 1.39 | 0.04  | 0.179 |
| 115 | KEGG_TYROSINE_METABOLISM                                       | 37  | 0.57 | 1.38 | 0.049 | 0.196 |
| 116 | REACTOME_DNA_REPLICATION                                       | 184 | 0.44 | 1.36 | 0.015 | 0.208 |
| 117 | REACTOME_RNA_POL_II_PRE_TRANSCRIPTION_EVENTS                   | 50  | 0.53 | 1.36 | 0.043 | 0.205 |
| 118 | REACTOME_CHROMOSOME_MAINTENANCE                                | 104 | 0.46 | 1.35 | 0.041 | 0.211 |
| 119 | REACTOME_POST_TRANSLATIONAL_PROTEIN_MODIFICATION               | 167 | 0.44 | 1.34 | 0.024 | 0.22  |

---



**Supplemental Table 5. Gene sets enriched in phenotype HJ compared to WT (erythroblasts).**

| GS                                                                                                               | SIZE | ES   | NES  | NOM p-val | FDR q-val |
|------------------------------------------------------------------------------------------------------------------|------|------|------|-----------|-----------|
| 1 REACTOME_PEPTIDE_CHAIN_ELONGATION                                                                              | 76   | 0.54 | 2.27 | 0.000     | 0.000     |
| 2 KEGG_RIBOSOME                                                                                                  | 76   | 0.54 | 2.26 | 0.000     | 0.000     |
| 3 REACTOME_3_UTR_MEDIATED_TRANSLATIONAL_REGULATION                                                               | 82   | 0.53 | 2.22 | 0.000     | 0.001     |
| 4 REACTOME_FORMATION_OF_THE_TERNARY_COMPLEX_AND_SUBSEQUENTLY_THE_43S_COMPLEX                                     | 34   | 0.62 | 2.22 | 0.000     | 0.001     |
| 5 REACTOME_ACTIVATION_OF_THE_MRNA_UPON_BINDING_OF_THE_CAP_BINDING_COMPLEX_AND_EIF5_AND_SUBSEQUENT_BINDING_TO_43S | 40   | 0.59 | 2.16 | 0.000     | 0.001     |
| 6 REACTOME_SRP_DEPENDENT_COTRANSLATIONAL_PROTEIN_TARGETING_TO_MEMBRANE                                           | 87   | 0.50 | 2.14 | 0.000     | 0.001     |
| 7 REACTOME_TRANSLATION                                                                                           | 103  | 0.48 | 2.12 | 0.000     | 0.001     |
| 8 REACTOME_INTERFERON_SIGNALING                                                                                  | 52   | 0.53 | 2.09 | 0.000     | 0.002     |
| 9 REACTOME_NONSENSE_MEDIATED_DECAY_ENHANCED_BY_THE_EXON_JUNCTION_COMPLEX                                         | 88   | 0.49 | 2.07 | 0.000     | 0.002     |
| 10 REACTOME_INTERFERON_ALPHA_BETA_SIGNALING                                                                      | 24   | 0.63 | 2.04 | 0.000     | 0.003     |
| 11 REACTOME_INFLUENZA_LIFE_CYCLE                                                                                 | 93   | 0.46 | 1.99 | 0.000     | 0.004     |
| 12 REACTOME_INFLUENZA_VIRAL_RNA_TRANSCRIPTION_AND_REPLICATION                                                    | 81   | 0.47 | 1.98 | 0.001     | 0.004     |
| 13 REACTOME_DIABETES_PATHWAYS                                                                                    | 36   | 0.55 | 1.97 | 0.000     | 0.005     |
| 14 REACTOME_METABOLISM_OF_RNA                                                                                    | 162  | 0.41 | 1.94 | 0.000     | 0.007     |
| 15 REACTOME_METABOLISM_OF_MRNA                                                                                   | 149  | 0.42 | 1.94 | 0.000     | 0.007     |
| 16 REACTOME_INTERFERON_GAMMA_SIGNALING                                                                           | 19   | 0.60 | 1.86 | 0.003     | 0.016     |
| 17 KEGG_RIG_I_LIKE_RECEPTOR_SIGNALING_PATHWAY                                                                    | 16   | 0.63 | 1.83 | 0.002     | 0.021     |
| 18 KEGG_P53_SIGNALING_PATHWAY                                                                                    | 23   | 0.57 | 1.83 | 0.003     | 0.020     |
| 19 REACTOME_UNFOLDED_PROTEIN_RESPONSE                                                                            | 27   | 0.55 | 1.80 | 0.005     | 0.028     |

|    |                                                                         |     |      |      |       |       |
|----|-------------------------------------------------------------------------|-----|------|------|-------|-------|
| 20 | REACTOME_RIG_I_MDA5_MEDIATED_INDUCTION_OF_IFN_ALPHA_BETA_PATHWAYS       | 25  | 0.53 | 1.74 | 0.005 | 0.046 |
| 21 | KEGG_PROTEASOME                                                         | 41  | 0.47 | 1.72 | 0.003 | 0.053 |
| 22 | REACTOME_P53_DEPENDENT_G1_DNA_DAMAGE_RESPONSE                           | 47  | 0.46 | 1.72 | 0.003 | 0.054 |
| 23 | REACTOME_ANTIVIRAL_MECHANISM_BY_IFN_STIMULATED_GENES                    | 24  | 0.52 | 1.71 | 0.002 | 0.056 |
| 24 | REACTOME_DOWNSTREAM_SIGNALING_EVENTS_OF_B_CELL_RECEPTOR_BCR             | 64  | 0.42 | 1.69 | 0.003 | 0.065 |
| 25 | REACTOME_ORC1_REMOVAL_FROM_CHROMATIN                                    | 51  | 0.44 | 1.68 | 0.005 | 0.068 |
| 26 | BIOCARTA_PROTEASOME_PATHWAY                                             | 26  | 0.50 | 1.66 | 0.013 | 0.076 |
| 27 | REACTOME_AUTODEGRADATION_OF_CDH1_BY_CDH1_APC_C                          | 47  | 0.44 | 1.66 | 0.003 | 0.079 |
| 28 | REACTOME_CDT1_ASSOCIATION_WITH_THE_CDC6_ORC_ORIGIN_COMPLEX              | 43  | 0.44 | 1.65 | 0.011 | 0.084 |
| 29 | REACTOME_DESTABILIZATION_OF_MRNA_BY_AUF1_HNRNP_D0                       | 46  | 0.43 | 1.64 | 0.011 | 0.085 |
| 30 | REACTOME_CDK_MEDIATED_PHOSPHORYLATION_AND_REMOVAL_OF_CDC6               | 43  | 0.44 | 1.64 | 0.009 | 0.084 |
| 31 | REACTOME_ACTIVATION_OF_NF_KAPPAB_IN_B_CELLS                             | 50  | 0.42 | 1.62 | 0.008 | 0.093 |
| 32 | REACTOME_SCFSKP2_MEDIATED_DEGRADATION_OF_P27_P21                        | 46  | 0.43 | 1.61 | 0.014 | 0.093 |
| 33 | KEGG_ANTIGEN_PROCESSING_AND_PRESENTATION                                | 24  | 0.50 | 1.61 | 0.015 | 0.092 |
| 34 | REACTOME_AUTODEGRADATION_OF_THE_E3_UBIQUITIN_LIGASE_COP1                | 44  | 0.43 | 1.60 | 0.011 | 0.094 |
| 35 | REACTOME_P53_INDEPENDENT_G1_S_DNA_DAMAGE_CHECKPOINT                     | 44  | 0.43 | 1.60 | 0.014 | 0.096 |
| 36 | REACTOME_VIF_MEDIATED_DEGRADATION_OF_APOBEC3G                           | 46  | 0.42 | 1.60 | 0.015 | 0.094 |
| 37 | REACTOME_SIGNALING_BY_THE_B_CELL_RECEPTOR_BCR                           | 72  | 0.38 | 1.59 | 0.006 | 0.100 |
| 38 | REACTOME_METABOLISM_OF_PROTEINS                                         | 175 | 0.34 | 1.59 | 0.001 | 0.098 |
| 39 | REACTOME_CYTOKINE_SIGNALING_IN_IMMUNE_SYSTEM                            | 79  | 0.37 | 1.57 | 0.013 | 0.105 |
| 40 | REACTOME_CYCLIN_E_ASSOCIATED_EVENTS_DURING_G1_S_TRANSITION_             | 48  | 0.42 | 1.57 | 0.019 | 0.102 |
| 41 | REACTOME_ER_PHAGOSOME_PATHWAY                                           | 50  | 0.41 | 1.56 | 0.016 | 0.112 |
| 42 | OMES<br>REACTOME_CROSS_PRESENTATION_OF_SOLUBLE_EXOGENOUS_ANTIGENS_ENDOS | 42  | 0.42 | 1.55 | 0.017 | 0.119 |
| 43 | REACTOME_SYNTHESIS_OF_DNA                                               | 57  | 0.39 | 1.55 | 0.014 | 0.117 |

|    |                                                                                                                   |     |      |      |       |       |
|----|-------------------------------------------------------------------------------------------------------------------|-----|------|------|-------|-------|
| 44 | REACTOME_ASSEMBLY_OF_THE_PRE_REPLICATIVE_COMPLEX                                                                  | 48  | 0.41 | 1.55 | 0.025 | 0.114 |
| 45 | REACTOME_REGULATION_OF_APOPTOSIS                                                                                  | 45  | 0.41 | 1.53 | 0.020 | 0.123 |
| 46 | REACTOME_CELL_CYCLE_CHECKPOINTS                                                                                   | 64  | 0.38 | 1.53 | 0.014 | 0.126 |
| 47 | REACTOME_SCF_BETA_TRCP_MEDIATED_DEGRADATION_OF_EMI1                                                               | 44  | 0.41 | 1.53 | 0.022 | 0.124 |
| 48 | REACTOME_APC_C_CDC20_MEDIATED_DEGRADATION_OF_MITOTIC_PROTEINS                                                     | 50  | 0.40 | 1.52 | 0.021 | 0.122 |
| 49 | REACTOME_HOST_INTERACTIONS_OF_HIV_FACTORS                                                                         | 76  | 0.36 | 1.51 | 0.012 | 0.135 |
| 50 | REACTOME_APC_C_CDH1_MEDIATED_DEGRADATION_OF_CDC20_AND_OTHER_APC_C_CDH1_TARGETED_PROTEINS_IN_LATE_MITOSIS_EARLY_G1 | 50  | 0.39 | 1.49 | 0.021 | 0.148 |
| 51 | REACTOME_FACTORS_INVOLVED_IN_MEGAKARYOCYTE_DEVELOPMENT_AND_PLATELET_PRODUCTION                                    | 29  | 0.43 | 1.49 | 0.030 | 0.145 |
| 52 | REACTOME_PI_3K_CASCADE                                                                                            | 16  | 0.50 | 1.46 | 0.045 | 0.164 |
| 53 | REACTOME_SIGNALING_BY_WNT                                                                                         | 51  | 0.38 | 1.46 | 0.039 | 0.162 |
| 54 | REACTOME_M_G1_TRANSITION                                                                                          | 50  | 0.37 | 1.42 | 0.045 | 0.197 |
| 55 | REACTOME_APOPTOSIS                                                                                                | 72  | 0.34 | 1.41 | 0.045 | 0.215 |
| 56 | REACTOME_IMMUNE_SYSTEM                                                                                            | 293 | 0.27 | 1.38 | 0.014 | 0.230 |

---

**Supplemental Table 6. Gene sets enriched in phenotype HJ compared to J (Erythroblasts).**

| GS                                                                                                               | SIZE | ES   | NES  | NOM p-val | FDR q-val |
|------------------------------------------------------------------------------------------------------------------|------|------|------|-----------|-----------|
| 1 REACTOME_NONSENSE_MEDIATED_DECAY_ENHANCED_BY_THE_EXON_JUNCTION_COMPLEX                                         | 88   | 0.53 | 2.20 | 0.000     | 0.002     |
| 2 REACTOME_3_UTR_MEDIATED_TRANSLATIONAL_REGULATION                                                               | 82   | 0.53 | 2.18 | 0.000     | 0.002     |
| 3 REACTOME_PEPTIDE_CHAIN_ELONGATION                                                                              | 76   | 0.54 | 2.17 | 0.000     | 0.002     |
| 4 REACTOME_ACTIVATION_OF_THE_MRNA_UPON_BINDING_OF_THE_CAP_BINDING_COMPLEX_AND_EIFS_AND_SUBSEQUENT_BINDING_TO_43S | 40   | 0.59 | 2.12 | 0.000     | 0.002     |
| 5 REACTOME_FORMATION_OF_THE_TERNARY_COMPLEX_AND_SUBSEQUENTLY_THE_43S_COMPLEX                                     | 34   | 0.62 | 2.10 | 0.000     | 0.002     |
| 6 REACTOME_METABOLISM_OF_MRNA                                                                                    | 149  | 0.46 | 2.07 | 0.000     | 0.004     |
| 7 KEGG_RIBOSOME                                                                                                  | 76   | 0.50 | 2.02 | 0.000     | 0.007     |
| 8 REACTOME_METABOLISM_OF_RNA                                                                                     | 162  | 0.44 | 2.01 | 0.000     | 0.006     |
| 9 REACTOME_TRANSLATION                                                                                           | 103  | 0.46 | 1.96 | 0.000     | 0.012     |
| 10 REACTOME_SRP_DEPENDENT_COTRANSLATIONAL_PROTEIN_TARGETING_TO_MEMBRANE                                          | 87   | 0.46 | 1.88 | 0.000     | 0.026     |
| 11 REACTOME_INFLUENZA_VIRAL_RNA_TRANSCRIPTION_AND_REPLICATION                                                    | 81   | 0.46 | 1.87 | 0.000     | 0.025     |
| 12 REACTOME_INFLUENZA_LIFE_CYCLE                                                                                 | 93   | 0.44 | 1.82 | 0.000     | 0.040     |
| 13 REACTOME_P53_DEPENDENT_G1_DNA_DAMAGE_RESPONSE                                                                 | 47   | 0.49 | 1.80 | 0.000     | 0.044     |
| 14 REACTOME_ORC1_REMOVAL_FROM_CHROMATIN                                                                          | 51   | 0.46 | 1.72 | 0.002     | 0.097     |
| 15 REACTOME_AUTODEGRADATION_OF_THE_E3_UBIQUITIN_LIGASE_COP1                                                      | 44   | 0.47 | 1.72 | 0.005     | 0.093     |
| 16 REACTOME_CDT1_ASSOCIATION_WITH_THE_CDC6_ORC_ORIGIN_COMPLEX                                                    | 43   | 0.46 | 1.72 | 0.007     | 0.090     |
| 17 REACTOME_M_G1_TRANSITION                                                                                      | 50   | 0.46 | 1.70 | 0.000     | 0.096     |
| 18 REACTOME_SYNTHESIS_OF_DNA                                                                                     | 57   | 0.44 | 1.70 | 0.003     | 0.092     |
| 19 REACTOME_ASSEMBLY_OF_THE_PRE_REPLICATIVE_COMPLEX                                                              | 48   | 0.46 | 1.69 | 0.003     | 0.094     |
| 20 REACTOME_REGULATION_OF_APOPTOSIS                                                                              | 45   | 0.46 | 1.69 | 0.007     | 0.096     |
| 21 KEGG_PROTEASOME                                                                                               | 41   | 0.47 | 1.68 | 0.000     | 0.093     |

|    |                                                                              |     |      |      |       |       |
|----|------------------------------------------------------------------------------|-----|------|------|-------|-------|
| 22 | REACTOME_CDK_MEDIATED_PHOSPHORYLATION_AND_REMOVAL_OF_CDC6                    | 43  | 0.46 | 1.68 | 0.007 | 0.090 |
| 23 | REACTOME_ACTIVATION_OF_NF_KAPPAB_IN_B_CELLS                                  | 50  | 0.45 | 1.67 | 0.007 | 0.097 |
| 24 | REACTOME_METABOLISM_OF_PROTEINS                                              | 175 | 0.36 | 1.66 | 0.000 | 0.100 |
| 25 | REACTOME_DOWNSTREAM_SIGNALING_EVENTS_OF_B_CELL_RECEPTOR_BCR                  | 64  | 0.42 | 1.65 | 0.003 | 0.106 |
| 26 | REACTOME_SCF5KIP2_MEDIATED_DEGRADATION_OF_P27_P21                            | 46  | 0.44 | 1.65 | 0.010 | 0.105 |
| 27 | REACTOME_DNA_REPLICATION                                                     | 85  | 0.40 | 1.64 | 0.007 | 0.107 |
| 28 | REACTOME_MITOTIC_M_M_G1_PHASES                                               | 76  | 0.41 | 1.64 | 0.005 | 0.105 |
| 29 | REACTOME_P53_INDEPENDENT_G1_S_DNA_DAMAGE_CHECKPOINT                          | 44  | 0.44 | 1.63 | 0.005 | 0.106 |
| 30 | REACTOME_SIGNALING_BY_THE_B_CELL_RECEPTOR_BCR                                | 72  | 0.40 | 1.62 | 0.005 | 0.109 |
| 31 | REACTOME_VIF_MEDIATED_DEGRADATION_OF_APOBEC3G                                | 46  | 0.44 | 1.62 | 0.010 | 0.114 |
| 32 | REACTOME_DESTABILIZATION_OF_MRNA_BY_AUF1_HNRNP_D0                            | 46  | 0.44 | 1.60 | 0.010 | 0.120 |
| 33 | REACTOME_REGULATION_OF_MRNA_STABILITY_BY_PROTEINS_THAT_BIND_AU_RICH_ELEMENTS | 56  | 0.42 | 1.60 | 0.005 | 0.120 |
| 34 | REACTOME_AUTODEGRADATION_OF_CDH1_BY_CDH1_APC_C                               | 47  | 0.43 | 1.60 | 0.007 | 0.118 |
| 35 | PID_SMAD2_3NUCLEAR_PATHWAY                                                   | 28  | 0.47 | 1.57 | 0.023 | 0.145 |
| 36 | REACTOME_G1_S_TRANSITION                                                     | 60  | 0.41 | 1.57 | 0.013 | 0.142 |
| 37 | REACTOME_REGULATION_OF_ORNITHINE_DECARBOXYLASE_ODC                           | 46  | 0.42 | 1.56 | 0.011 | 0.142 |
| 38 | PID_E2F_PATHWAY                                                              | 26  | 0.47 | 1.56 | 0.021 | 0.138 |
| 39 | REACTOME_SCF_BETA_TRCP_MEDIATED_DEGRADATION_OF_EMI1                          | 44  | 0.44 | 1.56 | 0.015 | 0.135 |
| 40 | REACTOME_ER_PHAGOSOME_PATHWAY                                                | 50  | 0.42 | 1.56 | 0.016 | 0.136 |
| 41 | REACTOME_CYCLIN_E_ASSOCIATED_EVENTS_DURING_G1_S_TRANSITION_                  | 48  | 0.42 | 1.56 | 0.012 | 0.134 |
| 42 | REACTOME_S_PHASE                                                             | 61  | 0.40 | 1.56 | 0.015 | 0.132 |
| 43 | PID_IL4_2PATHWAY                                                             | 16  | 0.55 | 1.55 | 0.040 | 0.133 |
| 44 | REACTOME_SIGNALING_BY_WNT                                                    | 51  | 0.41 | 1.55 | 0.009 | 0.137 |
| 45 | BIOCARTA_PROTEASOME_PATHWAY                                                  | 26  | 0.47 | 1.54 | 0.026 | 0.140 |
| 46 | PID_P73PATHWAY                                                               | 21  | 0.49 | 1.54 | 0.039 | 0.140 |

|    |                                                                                                                   |    |      |      |       |       |
|----|-------------------------------------------------------------------------------------------------------------------|----|------|------|-------|-------|
| 47 | REACTOME_CELL_CYCLE_CHECKPOINTS                                                                                   | 64 | 0.39 | 1.53 | 0.015 | 0.142 |
| 48 | REACTOME_CROSS_PRESENTATION_OF_SOLUBLE_EXOGENOUS_ANTIGENS_ENDOSOMES                                               | 42 | 0.42 | 1.52 | 0.021 | 0.155 |
| 49 | REACTOME_MITOTIC_G1_G1_S_PHASES                                                                                   | 70 | 0.38 | 1.51 | 0.019 | 0.157 |
| 50 | BIOCARTA_CHREBP2_PATHWAY                                                                                          | 16 | 0.53 | 1.50 | 0.042 | 0.171 |
| 51 | PID_FCER1_PATHWAY                                                                                                 | 21 | 0.48 | 1.46 | 0.041 | 0.219 |
| 52 | REACTOME_METABOLISM_OF_LIPIDS_AND_LIPOPROTEINS                                                                    | 94 | 0.35 | 1.44 | 0.019 | 0.246 |
| 53 | REACTOME_APC_C_CDH1_MEDIATED_DEGRADATION_OF_CDC20_AND_OTHER_APC_C_CDH1_TARGETED_PROTEINS_IN_LATE_MITOSIS_EARLY_G1 | 50 | 0.39 | 1.43 | 0.048 | 0.247 |

---

**Supplemental Table 7. Mutations detected in the patients.**

| Case  | Diagnosis | <i>MIRlet-7c</i> | <i>HMGA2</i> mRNA | Gene    | Codon change | Amino acid change |
|-------|-----------|------------------|-------------------|---------|--------------|-------------------|
| S017  | ET        | >2.00            | <0.10             | DNMT3A  | c.2645G>A    | p.R882H           |
|       |           |                  |                   | JAK2    | c.1849G>T    | p.V617F           |
| S018  | ET        | 0.41             | <0.10             | JAK2    | c.1849G>T    | p.V617F           |
|       |           |                  |                   | TET2    | c.5696T>G    | p.L1899R          |
| S019  | ET        | >2.00            | <0.10             | CALR    | insertion 5  |                   |
| S024  | ET        | 1.33             | 0.55              | JAK2    | c.1849G>T    | p.V617F           |
| S034  | ET        | 1.38             | 0.30              | JAK2    | c.1849G>T    | p.V617F           |
| S036  | ET        | <b>0.13</b>      | 0.78              | JAK2    | c.1849G>T    | p.V617F           |
|       |           |                  |                   | PRPF40B | c.2533C>T    | p.Q845*           |
|       |           |                  |                   | PRPF40B | c.2537A>T    | p.Q846L           |
|       |           |                  |                   | PRPF40B | c.2539G>T    | p.A847S           |
| S043  | ET        | <b>0.17</b>      | <b>1.78</b>       | JAK2    | c.1849G>T    | p.V617F           |
| S044  | ET        | <b>0.17</b>      | 0.54              | JAK2    | c.1849G>T    | p.V617F           |
| S050  | ET        | <b>0.28</b>      | <b>1.50</b>       | JAK2    | c.1849G>T    | p.V617F           |
| S051  | ET        | 0.78             | 0.78              | DNMT3A  | c.2645G>A    | p.R882H           |
|       |           |                  |                   | JAK2    | c.1849G>T    | p.V617F           |
| S075  | ET        | <b>0.29</b>      | <b>1.89</b>       | none    |              |                   |
| S077  | ET        | <b>0.01</b>      | 0.47              | CALR    | deletion 4   |                   |
|       |           |                  |                   | SF3B1   | c.1996A>C    | p.K666Q           |
| S078  | ET        | <b>0.07</b>      | <b>39.74</b>      | JAK2    | c.1849G>T    | p.V617F           |
| S090  | ET        | <b>0.02</b>      | 0.46              | JAK2    | c.1849G>T    | p.V617F           |
|       |           |                  |                   | PRPF40B |              | p.D?L             |
|       |           |                  |                   | TET2    |              | p.-274            |
|       |           |                  |                   | TP53    | c.815T>A     | p.V272E           |
| S091  | ET        | <b>0.02</b>      | <b>2.78</b>       | JAK2    | c.1849G>T    | p.V617F           |
|       |           |                  |                   | TET2    |              | p.SF1284S         |
| S095  | ET        | 0.37             | 0.42              | JAK2    | c.1849G>T    | p.V617F           |
| S107  | ET        | <b>0.16</b>      | <b>1.03</b>       | JAK2    | c.1849G>T    | p.V617F           |
| S117  | ET        | <b>0.03</b>      | <b>2.74</b>       | JAK2    | c.1849G>T    | p.V617F           |
|       |           |                  |                   | TET2    | c.1249C>T    | p.Q417*           |
| S118  | ET        | 1.39             | 0.27              | JAK2    | c.1849G>T    | p.V617F           |
| S119  | ET        | 0.49             | 0.68              | JAK2    | c.1849G>T    | p.V617F           |
| S1002 | ET        | 0.33             | <b>2.55</b>       | JAK2    | c.1849G>T    | p.V617F           |
| S1004 | ET        | 0.52             | 0.62              | JAK2    | c.1849G>T    | p.V617F           |

|       |     |             |               | TET2   |             | p.-848Y? |
|-------|-----|-------------|---------------|--------|-------------|----------|
| S1005 | ET  | 1.33        | <0.10         | JAK2   | c.1849G>T   | p.V617F  |
| S1008 | ET  | 0.66        | 0.63          | JAK2   | c.1849G>T   | p.V617F  |
| S1009 | ET  | 1.29        | 0.92          | none   |             |          |
| S1019 | ET  | <b>0.06</b> | <b>1.92</b>   | JAK2   | c.1849G>T   | p.V617F  |
|       |     |             |               | JAK2   | c.2569A>G   | p.K857E  |
| S1105 | ET  | <b>0.23</b> | <0.10         | JAK2   | c.1849G>T   | p.V617F  |
| S023  | PMF | 0.36        | <b>101.99</b> | CBL    | c.1199T>G   | p.M400R  |
|       |     |             |               | IDH1   | c.395G>A    | p.R132H  |
|       |     |             |               | JAK2   | c.1849G>T   | p.V617F  |
| S037  | PMF | 0.73        | <b>82.56</b>  | ASXL1  | c.2077C>T   | p.R693*  |
|       |     |             |               | JAK2   | c.1849G>T   | p.V617F  |
| S045  | PMF | 0.36        | <b>1.56</b>   | JAK2   | c.1849G>T   | p.V617F  |
| S046  | PMF | 0.47        | <b>1.70</b>   | ASXL1  |             | p.-591?  |
|       |     |             |               | EZH2   |             | p.-165   |
|       |     |             |               | JAK2   | c.1849G>T   | p.V617F  |
| S053  | PMF | <b>0.26</b> | <b>3.52</b>   | IDH2   | c.419G>A    | p.R140Q  |
|       |     |             |               | KRAS   | c.182A>G    | p.Q61R   |
|       |     |             |               | RUNX1  | c.205G>C    | p.G69R   |
| S093  | PMF | 1.01        | <b>2.53</b>   | none   |             |          |
| S094  | PMF | <b>0.06</b> | 0.55          | JAK2   | c.1849G>T   | p.V617F  |
| S114  | PMF | 0.36        | <b>13.79</b>  | JAK2   | c.1849G>T   | p.V617F  |
|       |     |             |               | SF3B1  | c.1998G>C   | p.K666N  |
| S120  | PMF | 0.41        | <b>1.06</b>   | JAK2   | c.1849G>T   | p.V617F  |
|       |     |             |               | EZH2   | c.1981A>G   | p.K661E  |
| S127  | PMF | <b>0.22</b> | <b>7.83</b>   | CALR   | deletion 52 |          |
|       |     |             |               | KRAS   | c.35G>C     | p.G12A   |
|       |     |             |               | SF3B1  | c.1998G>T   | p.K666N  |
| S1015 | PMF | 0.77        | <b>25.21</b>  | SETBP1 | c.2602G>A   | p.D868N  |
|       |     |             |               | STAG2  | c.1042C>T   | p.L348F  |
| S1016 | PMF | <b>0.18</b> | <b>9.43</b>   | JAK2   | c.1849G>T   | p.V617F  |
|       |     |             |               | SF3B1  | c.1996A>C   | p.K666Q  |
| S1023 | PMF | <b>0.09</b> | <b>7.19</b>   | JAK2   | c.1849G>T   | p.V617F  |
|       |     |             |               | KRAS   | c.35G>C     | p.G12A   |
| S1106 | PMF | 0.34        | <b>1.63</b>   | DNMT3A | c.2644C>T   | p.R882C  |
|       |     |             |               | MPL    |             | p.W515L  |
|       |     |             |               | TET2   | c.4075C>T   | p.R1359C |



|       |     |             |               |       |           |          |
|-------|-----|-------------|---------------|-------|-----------|----------|
| S1137 | PMF | 1.26        | <b>255.50</b> | ASXL1 | c.2548G>T | p.E850*  |
|       |     |             |               | JAK2  | c.1849G>T | p.V617F  |
|       |     |             |               | SMC3  |           | p.LK933L |
| S1145 | PMF | 0.83        | <b>23.93</b>  | JAK2  | c.1849G>T | p.V617F  |
|       |     |             |               | SF3A1 |           | p.N?T    |
|       |     |             |               | TET2  | c.3851C>T | p.S1284F |
| S1146 | PMF | <b>0.09</b> | <b>39.28</b>  | JAK2  | c.1849G>T | p.V617F  |
|       |     |             |               | TET2  | c.3319T>C | p.S1107P |
|       |     |             |               | TP53  | c.91G>A   | p.V31I   |
| S1151 | PMF | <b>0.03</b> | <b>1.85</b>   | ASXL1 | c.2548G>T | p.E850*  |
|       |     |             |               | IDH1  | c.38T>A   | p.M13K   |
|       |     |             |               | JAK2  | c.1849G>T | p.V617F  |
|       |     |             |               | TET2  | c.3319T>C | p.S1107P |

Low *MIRlet-7* and high *HMGA2* mRNA levels are indicated as blue and red, respectively.
